# Supplementary material for: A Fuzzy ARIMA Correction Model for Transport Volume Forecast
Source: Hindawi journal article supplement (doi:10.1155/2021/6655102), 2021-03-10
Supplement: f1 [file 6655102.f1.pdf]

| 年(密西西比河)       | 1970        | 1971        | 1972        | 1973        | 1974        | 1975        | 1976        | 1977        | 1978        | 1979        | 1980        | 1981        |
|----------------|-------------|-------------|-------------|-------------|-------------|-------------|-------------|-------------|-------------|-------------|-------------|-------------|
| 密西西比河干流总量 (亿吨) | 3.02        | 3.08        | 3.14        | 3.18        | 3.3         | 3.3         | 3.46        | 3.52        | 3.55        | 3.7         | 3.66        | 3.63        |
| 煤炭 (亿吨)        | u           | u           | u           | u           | u           | u           | u           | u           | u           | u           | u           | u           |
| 石油及石油产品 (亿吨)   | u           | u           | u           | u           | u           | u           | u           | u           | u           | u           | u           | u           |
| 化工品 (亿吨)       | u           | u           | u           | u           | u           | u           | u           | u           | u           | u           | u           | u           |
| 原材料 (亿吨)       | u           | u           | u           | u           | u           | u           | u           | u           | u           | u           | u           | u           |
| 工业制成品 (亿吨)     | u           | u           | u           | u           | u           | u           | u           | u           | u           | u           | u           | u           |
| 农作物 (亿吨)       | u           | u           | u           | u           | u           | u           | u           | u           | u           | u           | u           | u           |
| 工业装备 (亿吨)      | u           | u           | u           | u           | u           | u           | u           | u           | u           | u           | u           | u           |
| 其它 (亿吨)        |             |             |             |             |             |             |             |             |             |             |             |             |
| 密西西比河水系总量 (亿吨) | 4.310037183 | 4.365152748 | 4.62970746  | 4.62970746  | 4.883239059 | 4.997879434 | 5.489510274 | 5.941457907 | 6.095781489 | 6.415451766 | 6.439702615 | 6.492613557 |
| 煤炭 (亿吨)        |             |             |             |             |             |             |             |             |             |             |             |             |
| 石油及石油产品 (亿吨)   |             |             |             |             |             |             |             |             |             |             |             |             |
| 化工品 (亿吨)       |             |             |             |             |             |             |             |             |             |             |             |             |
| 原材料 (亿吨)       |             |             |             |             |             |             |             |             |             |             |             |             |
| 工业制成品 (亿吨)     |             |             |             |             |             |             |             |             |             |             |             |             |
| 农作物 (亿吨)       |             |             |             |             |             |             |             |             |             |             |             |             |
| 工业装备 (亿吨)      |             |             |             |             |             |             |             |             |             |             |             |             |
| 其它 (亿吨)        |             |             |             |             |             |             |             |             |             |             |             |             |
| 人口 (亿人)        | 2.09588     | 2.11462     | 2.13352     | 2.15269     | 2.17218     | 2.19205     | 2.21239     | 2.23324     | 2.2545      | 2.276       | 2.29763     | 2.31939     |
| 城镇人口 (亿人)      | 1.51        | 1.33        | 1.55        | 1.56        | 1.57        | 1.59        | 1.61        | 1.62        | 1.64        | 1.66        | 1.68        | 1.7         |
| 城镇化率 (%)       | 0.736585366 | 0.639423077 | 0.738095238 | 0.735849057 | 0.73364486  | 0.736111111 | 0.73853211  | 0.736363636 | 0.735426009 | 0.737777778 | 0.740088106 | 0.742358079 |
| GDP (十亿美元)     | 1075.884    | 1167.77     | 1282.449    | 1428.549    | 1548.825    | 1688.923    | 1877.587    | 2085.951    | 2356.571    | 2632.143    | 2862.505    | 3210.956    |
| 人均GDP (万美元)    | 0.525       | 0.56        | 0.611       | 0.67        | 0.724       | 0.782       | 0.861       | 0.95        | 1.06        | 1.17        | 1.26        | 1.4         |
| 美国工业产值 (十亿美元)  | 245.871     | 259.354     | 285.215     | 315.234     | 331.93      | 352.312     | 402.688     | 456.673     | 510.013     | 568.044     | 585.597     | 651.19      |
| 美国工业占比         | 0.228529284 | 0.222093392 | 0.222398707 | 0.220667264 | 0.214310849 | 0.208601576 | 0.214471021 | 0.218927961 | 0.216421657 | 0.215810463 | 0.204575014 | 0.20280253  |
|                | 1970        | 1971        | 1972        | 1973        | 1974        | 1975        | 1976        | 1977        | 1978        | 1979        | 1980        | 1981        |

|   | 1982        | 1983        | 1984        | 1985        | 1986        | 1987        | 1988        | 1989        | 1990        | 1991        | 1992        | 1993        | 1994        | 1995        |
|---|-------------|-------------|-------------|-------------|-------------|-------------|-------------|-------------|-------------|-------------|-------------|-------------|-------------|-------------|
|   | 3.47        | 3.726       | 3.771272727 | 3.816545455 | 3.63        | 3.86        | 4.01        | 4.2         | 4.31        | 4.28        | 4.45        | 4.31        | 4.51        | 4.72        |
| u | u           | u           | u           | u           | 0.570619176 | 0.537960527 | 0.565176068 | 0.577876654 | 0.668595124 | 0.700346588 | 0.663152016 | 0.581505393 | 0.593298794 | 0.586041316 |
| u | u           | u           | u           | u           | 0.930771502 | 0.973409183 | 1.045983959 | 1.168453894 | 1.158474862 | 1.128537767 | 1.186597588 | 1.255543625 | 1.264615472 | 1.206555651 |
| u | u           | u           | u           | u           | 0.419119331 | 0.434541471 | 0.43817021  | 0.399161268 | 0.365595434 | 0.348358925 | 0.366502619 | 0.377388835 | 0.440891764 | 0.450870796 |
| u | u           | u           | u           | u           | 0.430005548 | 0.414583408 | 0.396439714 | 0.457221089 | 0.49985877  | 0.488065369 | 0.503487509 | 0.492601292 | 0.576062285 | 0.589670055 |
| u | u           | u           | u           | u           | 0.138799259 | 0.134263336 | 0.143335183 | 0.139706444 | 0.138799259 | 0.148778291 | 0.142427998 | 0.1660148   | 0.298463766 | 0.308442798 |
| u | u           | u           | u           | u           | 1.128537767 | 1.351705203 | 1.40704347  | 1.440609304 | 1.470546399 | 1.456938628 | 1.582130117 | 1.427908718 | 1.323582477 | 1.567615162 |
| u | u           | u           | u           | u           | 0.007257478 | 0.005443108 | 0.007257478 | 0.009979032 | 0.009071847 | 0.007257478 | 0.008164662 | 0.009071847 | 0.008164662 | 0.009071847 |
|   |             |             |             |             | 0.002721554 | 0.003628739 | 0.003628739 | 0.003628739 | 0.000907185 | 0.000907185 | 0.001814369 | 0.001814369 | 0.001814369 | 0.002721554 |
|   | 5.95248102  | 5.720995647 | 5.996573472 | 5.817999041 | 6.133260073 | 6.430884124 | 6.631504781 | 6.904877983 | 7.265333778 | 7.127544866 | 7.41965736  | 7.279663825 | 7.642324243 | 7.795545514 |
|   |             |             |             |             | 1.886054121 | 1.850780169 | 1.915816518 | 1.987466733 | 2.213440488 | 2.177064225 | 2.201315067 | 2.051400771 | 2.140687962 | 2.073446991 |
|   |             |             |             |             | 1.235690631 | 1.288601559 | 1.371274884 | 1.523393802 | 1.553156199 | 1.520086869 | 1.593941706 | 1.68653583  | 1.693149696 | 1.611578682 |
|   |             |             |             |             | 0.535723146 | 0.557769366 | 0.559973988 | 0.504858438 | 0.460765998 | 0.4409244   | 0.46297062  | 0.479505285 | 0.554462433 | 0.566587854 |
|   |             |             |             |             | 0.8818488   | 0.876337245 | 0.866416446 | 0.910508886 | 1.022944608 | 0.98105679  | 1.004205321 | 1.051604694 | 1.209235167 | 1.193802813 |
|   |             |             |             |             | 0.201722913 | 0.195109047 | 0.210541401 | 0.211643712 | 0.212746023 | 0.222666822 | 0.218257578 | 0.250224597 | 0.414468936 | 0.424389735 |
|   |             |             |             |             | 1.386707238 | 1.657875744 | 1.724014404 | 1.764799911 | 1.801176174 | 1.784641509 | 1.936760427 | 1.759288356 | 1.628113347 | 1.923532695 |
|   |             |             |             |             | 0.008818488 | 0.006613866 | 0.008818488 | 0.012125421 | 0.01102311  | 0.008818488 | 0.009920799 | 0.012125421 | 0.012125421 | 0.013227732 |
|   |             |             |             |             | 0.003306933 | 0.004409244 | 0.004409244 | 0.004409244 | 0.001102311 | 0.001102311 | 0.002204622 | 0.002204622 | 0.002204622 | 0.003306933 |
|   | 2.34133     | 2.36344     | 2.38574     | 2.40824     | 2.43099     | 2.45403     | 2.4774      | 2.50113     | 2.5253      | 2.54975     | 2.57454     | 2.6002      | 2.62742     | 2.65659     |
|   | 1.72        | 1.73        | 1.75        | 1.77        | 1.79        | 1.81        | 1.83        | 1.85        | 1.88        | 1.91        | 1.95        | 1.99        | 2.02        | 2.06        |
|   | 0.74137931  | 0.739316239 | 0.741525424 | 0.743697479 | 0.745833333 | 0.747933884 | 0.75        | 0.748987854 | 0.752       | 0.754940711 | 0.758754864 | 0.765384615 | 0.768060837 | 0.77443609  |
|   | 3344.991    | 3638.137    | 4040.693    | 4346.734    | 4590.155    | 4870.217    | 5252.629    | 5657.693    | 5979.589    | 6174.043    | 6539.299    | 6878.718    | 7308.755    | 7664.06     |
|   | 1.44        | 1.56        | 1.71        | 1.83        | 1.91        | 2.01        | 2.15        | 2.29        | 2.4         | 2.44        | 2.55        | 2.65        | 2.78        | 2.88        |
|   | 641.779     | 698.092     | 778.383     | 805.317     | 832.417     | 880.651     | 962.49      | 1017.834    | 1037.425    | 1044.988    | 1087.318    | 1127.393    | 1197.713    | 1265.457    |
|   | 0.191862699 | 0.191881724 | 0.192636016 | 0.185269446 | 0.181348342 | 0.18082377  | 0.183239669 | 0.179902656 | 0.173494366 | 0.169255057 | 0.166274397 | 0.163895802 | 0.163873738 | 0.165115748 |
|   | 1982        | 1983        | 1984        | 1985        | 1986        | 1987        | 1988        | 1989        | 1990        | 1991        | 1992        | 1993        | 1994        | 1995        |

| 1996        | 1997        | 1998        | 1999        | 2000        | 2001        | 2002        | 2003        | 2004        | 2005        | 2006        | 2007        | 2008        | 2009        |
|-------------|-------------|-------------|-------------|-------------|-------------|-------------|-------------|-------------|-------------|-------------|-------------|-------------|-------------|
| 4.59        | 4.58        | 4.57        | 4.65        | 4.68        | 4.57        | 4.55        | 4.34        | 4.51        | 4.22        | 4.52        | 4.54        | 4.42        | 4.06        |
| 0.574247915 | 0.55973296  | 0.537053342 | 0.471736044 | 0.45359235  | 0.457221089 | 0.420026516 | 0.382831943 | 0.430912733 | 0.421840886 | 0.475364783 | 0.486250999 | 0.564268883 | 0.462664197 |
| 1.181154479 | 1.2392143   | 1.158474862 | 1.172989817 | 1.228328084 | 1.238307116 | 1.202926912 | 1.152124569 | 1.202019728 | 1.17934011  | 1.237399931 | 1.364405789 | 1.319953739 | 1.204741282 |
| 0.439077395 | 0.428191178 | 0.414583408 | 0.408233115 | 0.43998458  | 0.437263025 | 0.43998458  | 0.478086337 | 0.48262226  | 0.470828859 | 0.462664197 | 0.487158184 | 0.455406719 | 0.401882822 |
| 0.576062285 | 0.60599938  | 0.632307736 | 0.629586182 | 0.597834717 | 0.591484424 | 0.58876287  | 0.61960715  | 0.654987353 | 0.615978411 | 0.6305      | 0.570619176 | 0.580598208 | 0.518002464 |
| 0.281227257 | 0.303906875 | 0.390996606 | 0.408233115 | 0.416397777 | 0.290299104 | 0.309349983 | 0.267619487 | 0.342915817 | 0.365595434 | 0.412769039 | 0.293927843 | 0.251290162 | 0.156035768 |
| 1.514998449 | 1.419744056 | 1.414300947 | 1.541306805 | 1.523163111 | 1.541306805 | 1.573965455 | 1.419744056 | 1.365312974 | 1.144867091 | 1.290923828 | 1.317232184 | 1.221977791 | 1.305438783 |
| 0.018143694 | 0.019958063 | 0.020865248 | 0.014514955 | 0.015422214 | 0.015422214 | 0.012700586 | 0.013607771 | 0.019958063 | 0.012700586 | 0.012700586 | 0.016329325 | 0.017236509 | 0.010886216 |
| 0.002721554 | 0.002721554 | 0.002721554 | 0.001814369 | 0.002721554 | 0.002721554 | 0.002721554 | 0.003628739 | 0.008164662 | 0.004535924 | 0.006350293 | 0.002721554 | 0.004535924 | 0.004535924 |
| 7.736020703 | 7.794443202 | 7.797750136 | 7.90246971  | 7.887037352 | 7.879321172 | 7.857274946 | 7.460442878 | 7.713974477 | 7.473670614 | 7.739327637 | 7.689723629 | 7.496819151 | 6.860785531 |
| 2.119744053 | 2.140687962 | 2.110925565 | 2.010615264 | 1.953295092 | 2.076753924 | 2.071242369 | 1.877235633 | 1.959908958 | 2.049196149 | 2.038173039 | 2.012819886 | 2.104311699 | 1.890463365 |
| 1.57630473  | 1.656773433 | 1.560872376 | 1.57630473  | 1.6534665   | 1.660080366 | 1.612680993 | 1.528905357 | 1.585123218 | 1.574100108 | 1.646852634 | 1.811096973 | 1.747162935 | 1.575202419 |
| 0.550053189 | 0.539030079 | 0.522495414 | 0.513676926 | 0.554462433 | 0.550053189 | 0.555564744 | 0.600759495 | 0.60627105  | 0.587531763 | 0.557813275 | 0.607373361 | 0.568792476 | 0.503756127 |
| 1.22356521  | 1.285294626 | 1.328284755 | 1.343717109 | 1.276476138 | 1.275373827 | 1.24561143  | 1.3227732   | 1.383400305 | 1.327182444 | 1.327182444 | 1.215849033 | 1.199314368 | 1.050502383 |
| 0.408957381 | 0.432105912 | 0.541234701 | 0.568792476 | 0.578713275 | 0.427696668 | 0.446435955 | 0.393525027 | 0.500449194 | 0.526904658 | 0.554462433 | 0.404548137 | 0.350534898 | 0.222668822 |
| 1.855189413 | 1.737242136 | 1.73062827  | 1.887156432 | 1.86290559  | 1.886054121 | 1.922430384 | 1.732832892 | 1.670001165 | 1.403241903 | 1.581816285 | 1.612680993 | 1.498040649 | 1.59835095  |
| 0.027557775 | 0.027557775 | 0.028660086 | 0.019841598 | 0.023148531 | 0.019841598 | 0.023148531 | 0.019841598 | 0.016534665 | 0.025353153 | 0.019841598 | 0.02204622  | 0.024250842 | 0.015432354 |
| 0.003306933 | 0.003306933 | 0.003306933 | 0.002204622 | 0.007716177 | 0.001102311 | 0.002204622 | 0.004492444 | 0.009920799 | 0.005511555 | 0.007716177 | 0.003306933 | 0.005511555 | 0.004492444 |
| 2.68803     | 2.72137     | 2.75543     | 2.78862     | 2.81983     | 2.84852     | 2.87507     | 2.90028     | 2.92539     | 2.9513      | 2.97827     | 3.00595     | 3.03374     | 3.06076     |
| 2.09        | 2.13        | 2.16        | 2.2         | 2.23        | 2.26        | 2.29        | 2.32        | 2.35        | 2.39        | 2.42        | 2.45        | 2.48        | 2.51        |
| 0.776951673 | 0.78021978  | 0.782608696 | 0.788530466 | 0.790780142 | 0.792982456 | 0.795138889 | 0.8         | 0.802047782 | 0.807432432 | 0.812080537 | 0.813953488 | 0.815789474 | 0.817589577 |
| 8100.201    | 8608.515    | 9089.168    | 9660.624    | 10284.779   | 10621.824   | 10977.514   | 11510.67    | 12274.928   | 13093.726   | 13855.888   | 14477.635   | 14718.582   | 14418.739   |
| 3.01        | 3.16        | 3.29        | 3.46        | 3.64        | 3.73        | 3.82        | 3.97        | 4.19        | 4.43        | 4.64        | 4.81        | 4.84        | 4.7         |
| 1307.633    | 1390.088    | 1435.125    | 1493.708    | 1555.335    | 1478.483    | 1472.749    | 1531.094    | 1619.158    | 1704.173    | 1804.221    | 1854.33     | 1814.12     | 1726.712    |
| 0.161432167 | 0.161       | 0.158       | 0.155       | 0.151       | 0.139       | 0.134       | 0.133       | 0.132       | 0.13        | 0.13        | 0.128       | 0.123       | 0.12        |
| 1996        | 1997        | 1998        | 1999        | 2000        | 2001        | 2002        | 2003        | 2004        | 2005        | 2006        | 2007        | 2008        | 2009        |

| 2010        | 2011        | 2012        | 2013        | 2014        | 2015        | 2016        | 2017 年(密西西比河)          |
|-------------|-------------|-------------|-------------|-------------|-------------|-------------|------------------------|
| 4.38        | 4.52        | 4.62        | 4.48        | 4.86        | 4.73        | 4.78        | 总量 (亿吨)                |
| 0.490786923 | 0.683110079 | 0.728469314 | 0.561547329 | 0.385553498 | 0.307535613 | 0.230424914 | 煤炭 (亿吨)                |
| 1.273687319 | 1.299995675 | 1.346262095 | 1.450588335 | 1.485061354 | 1.51136971  | 1.577594193 | 石油及石油产品 (亿吨)           |
| 0.48443663  | 0.501673139 | 0.503487509 | 0.498951585 | 0.540682081 | 0.555197036 | 0.583319762 | 化工品 (亿吨)               |
| 0.541589266 | 0.558825775 | 0.537960527 | 0.547939559 | 0.606906564 | 0.538867712 | 0.466292936 | 原材料 (亿吨)               |
| 0.205023742 | 0.223167436 | 0.248568608 | 0.232239283 | 0.291206289 | 0.257640455 | 0.234960837 | 工业制成品 (亿吨)             |
| 1.370756082 | 1.236492746 | 1.231956823 | 1.163010785 | 1.517720003 | 1.529513404 | 1.658333632 | 农作物 (亿吨)               |
| 0.014514955 | 0.015422214 | 0.015422214 | 0.012700586 | 0.014514955 | 0.013607771 | 0.010886216 | 工业装备 (亿吨)              |
| 0.003628739 | 0.003628739 | 0.003628739 | 0.010886216 | 0.023586802 | 0.013607771 | 0.011793401 | 其它 (亿吨)                |
| 7.310528542 | 7.449419765 | 7.577287876 | 7.38548571  | 7.921209002 | 7.544218537 | 7.505637642 | 密西西比河水系总量 (亿吨)         |
| 1.953295092 | 2.178166536 | 2.216747421 | 1.999592154 | 1.819915461 | 1.496938338 | 1.291908492 | 煤炭 (亿吨)                |
| 1.671103476 | 1.703070495 | 1.767004533 | 1.905895719 | 1.952192781 | 1.983057489 | 2.067935436 | 石油及石油产品 (亿吨)           |
| 0.610680294 | 0.631624203 | 0.637135758 | 0.621703404 | 0.67240971  | 0.688944375 | 0.723116016 | 化工品 (亿吨)               |
| 1.086878646 | 1.095697134 | 1.086878646 | 1.086878646 | 1.192700502 | 1.129868775 | 1.053809316 | 原材料 (亿吨)               |
| 0.287703171 | 0.303135525 | 0.336204855 | 0.317465568 | 0.384706539 | 0.34171641  | 0.313056324 | 工业制成品 (亿吨)             |
| 1.677717342 | 1.513473003 | 1.51016607  | 1.424185812 | 1.854087102 | 1.869519456 | 2.02825224  | 农作物 (亿吨)               |
| 0.018739287 | 0.019841598 | 0.018739287 | 0.015432354 | 0.017636976 | 0.016534665 | 0.014330043 | 工业装备 (亿吨)              |
| 0.004409244 | 0.004409244 | 0.004409244 | 0.013227732 | 0.028660086 | 0.016534665 | 0.014330043 | 其它 (亿吨)                |
| 3.08641     | 3.11051     | 3.13335     | 3.15537     | 3.17719     | 3.19929     | 3.2218      | 3.24459 人口 (亿人)        |
| 2.54        | 2.57        | 2.59        | 2.57        | 2.6         | 2.61288     | 2.63743     | 2.66244 城镇人口 (亿人)      |
| 0.822006472 | 0.823717949 | 0.824840764 | 0.813291139 | 0.815047022 | 0.816706207 | 0.818620026 | 0.820578255 城镇化率 (%)   |
| 14964.372   | 15517.926   | 16155.255   | 16691.517   | 17427.609   | 18120.714   | 18624.475   | 19390.605 GDP (十亿美元)   |
| 4.84        | 4.98        | 5.15        | 5.28        | 5.47        | 5.64        | 5.76        | 5.95 人均GDP (万美元)       |
| 1830.585    | 1907.311    | 1983.643    | 2035.177    | 2111.498    | 2184.983    | 2182.952    | 2244.276 美国工业产值 (十亿美元) |
| 0.122       | 0.123       | 0.123       | 0.122       | 0.121       | 0.121       | 0.117       | 0.116 美国工业占比           |
| 2010        | 2011        | 2012        | 2013        | 2014        | 2015        | 2016        | 2017                   |
